# Supplementary material
Source: publisher site journal article supplement (http://kjim.org/upload/media/kjim-2022-249_suppl9.pdf)
Supplement: Supplementary file 1 [file kjim-2022-249_suppl9.pdf]

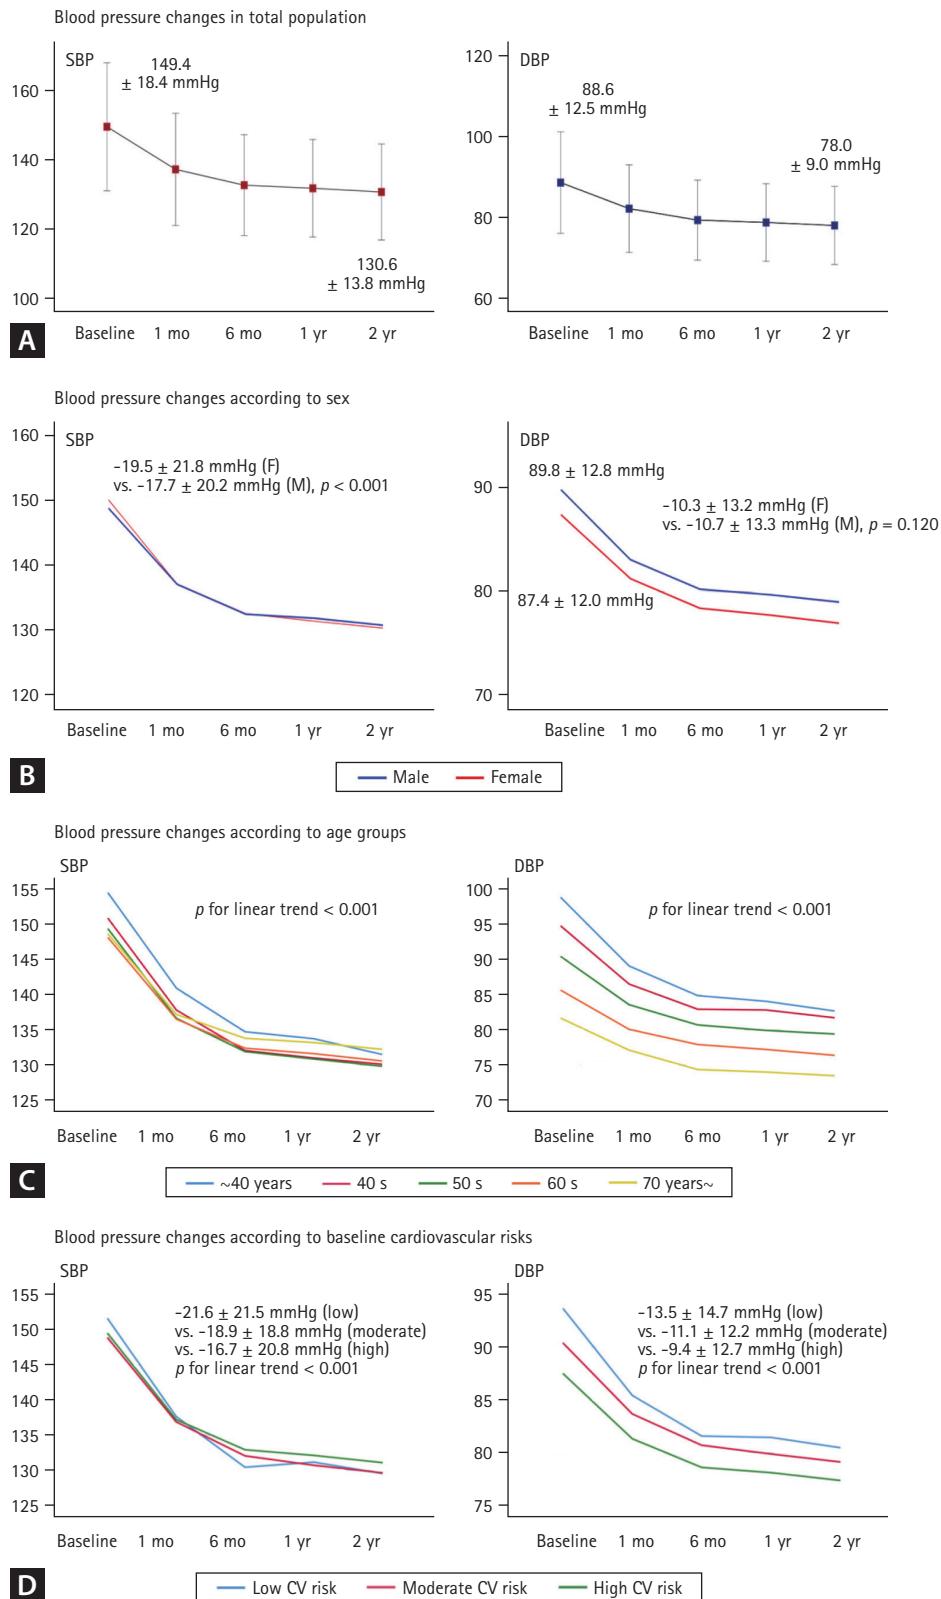

**Supplementary Figure 1.** Blood pressure changes according to age, sex, and baseline cardiovascular (CV) risks. (A) Blood pressure changes in total population. (B) Blood pressure changes according to sex. (C) Blood pressure changes according to age groups. (D) Blood pressure changes according to baseline cardiovascular risks. SBP, systolic blood pressure; DBP, diastolic blood pressure.
